# Supplementary material for: Chromatin-mediated microtubule nucleation in Drosophila syncytial embryos
Source: PubMed Central journal article supplement — Commun Integr Biol. 2014 Apr 2;7:e28512. doi: 10.4161/cib.28512 (PMC4091100; doi:10.4161/cib.28512), 2014-04-02
Supplement: cib-7-e28512-s02.pdf [file cib-7-e28512-s02.pdf]

## Supplemental Material to:

Daniel Hayward, James G Wakefield

### Chromatin-mediated microtubule nucleation in *Drosophila* syncytial embryos

Communicative & Integrative Biology 2014; 7

[https://www.landesbioscience.com/journals/cib/  
article/28512/](https://www.landesbioscience.com/journals/cib/article/28512/)

**Supplementary video 1:** Mitotic spindle formation visualised in Tubulin-GFP (green) and Histone-RFP (red) expressing syncytial embryos, injected with 5mg/ml BSA

**Supplementary video 2:** Mitotic spindle formation visualised in Tubulin-GFP (green) and Histone-RFP (red) expressing syncytial embryos, injected with 5mg/ml GST-RanT24N

**Supplementary video 3:** Mitotic spindle re-formation following cold treatment visualised in Tubulin-GFP (green) and Histone-RFP (red) expressing syncytial embryos, injected with 5mg/ml BSA

**Supplementary video 4:** Mitotic spindle re-formation following cold treatment visualised in Tubulin-GFP (green) and Histone-RFP (red) expressing syncytial embryos, injected with 5mg/ml GST-RanT24N
